# Supplementary material
Source: Research Square preprint supplement (doi:10.21203/rs.3.rs-9374386/v1)
Supplement: Supplementary file 1 [file 1fdd45ef24a409ac852ad5d8.docx]

Table S1. Subgroup Analysis for 30-day Mortality.

| Variables | n (%) | HR (95%CI) | *P* | P for interaction |
| --- | --- | --- | --- | --- |
|
| All patients | 4936 (100.00) | 1.05 (1.02 ~ 1.08) | **0.002** |  |
| Gender |  |  |  | 0.408 |
| F | 2152 (43.60) | 1.06 (1.02 ~ 1.11) | **0.009** |  |
| M | 2784 (56.40) | 1.04 (1.00 ~ 1.08) | 0.073 |  |
| Hypertension |  |  |  | 0.383 |
| No | 3484 (70.58) | 1.05 (1.02 ~ 1.09) | **0.003** |  |
| Yes | 1452 (29.42) | 1.04 (0.98 ~ 1.10) | 0.162 |  |
| Myocardial Infarct |  |  |  | 0.295 |
| No | 3318 (67.22) | 1.04 (1.01 ~ 1.08) | **0.022** |  |
| Yes | 1618 (32.78) | 1.06 (1.01 ~ 1.12) | **0.031** |  |
| Cerebrovascular Disease |  |  |  | 0.500 |
| No | 4354 (88.21) | 1.04 (1.01 ~ 1.08) | **0.009** |  |
| Yes | 582 (11.79) | 1.09 (1.00 ~ 1.18) | **0.043** |  |
| Diabetes |  |  |  | 0.633 |
| No | 2899 (58.73) | 1.05 (1.01 ~ 1.09) | **0.009** |  |
| Yes | 2037 (41.27) | 1.06 (1.01 ~ 1.11) | **0.030** |  |
| CKD |  |  |  | 0.931 |
| No | 3105 (62.91) | 1.05 (1.01 ~ 1.09) | **0.020** |  |
| Yes | 1831 (37.09) | 1.05 (1.00 ~ 1.10) | **0.033** |  |
| HR: Hazard Ratio, CI: Confidence Interval | | | | |

Table S2. Subgroup Analysis for 1-year Mortality.

| Variables | n (%) | HR (95%CI) | *P* | P for interaction |
| --- | --- | --- | --- | --- |
|
| All patients | 4936 (100.00) | 1.02 (1.00 ~ 1.04) | **0.040** |  |
| Gender |  |  |  | 0.414 |
| F | 2152 (43.60) | 1.03 (1.00 ~ 1.07) | **0.038** |  |
| M | 2784 (56.40) | 1.02 (0.99 ~ 1.05) | 0.236 |  |
| Hypertension |  |  |  | 0.250 |
| No | 3484 (70.58) | 1.03 (1.01 ~ 1.06) | **0.018** |  |
| Yes | 1452 (29.42) | 1.00 (0.97 ~ 1.05) | 0.813 |  |
| Myocardial Infarct |  |  |  | 0.293 |
| No | 3318 (67.22) | 1.02 (0.99 ~ 1.05) | 0.120 |  |
| Yes | 1618 (32.78) | 1.02 (0.98 ~ 1.06) | 0.251 |  |
| Cerebrovascular Disease |  |  |  | 0.175 |
| No | 4354 (88.21) | 1.02 (0.99 ~ 1.04) | 0.151 |  |
| Yes | 582 (11.79) | 1.06 (1.00 ~ 1.12) | 0.060 |  |
| Diabetes |  |  |  | 0.933 |
| No | 2899 (58.73) | 1.02 (0.99 ~ 1.05) | 0.152 |  |
| Yes | 2037 (41.27) | 1.03 (1.00 ~ 1.07) | 0.086 |  |
| CKD |  |  |  | 0.910 |
| No | 3105 (62.91) | 1.02 (0.99 ~ 1.04) | 0.243 |  |
| Yes | 1831 (37.09) | 1.03 (1.00 ~ 1.06) | 0.085 |  |
| HR: Hazard Ratio, CI: Confidence Interval | | | | |
